# Supplementary material for: A resistant and stable HKUST@MC composite for highly efficient gas adsorptive desulfurization
Source: Royal Society of Chemistry journal article supplement (doi:10.1039/d3nj05614g), 2024-01-01
Supplement: d3nj05614g1.pdf [file d3nj05614g1.pdf]

Electronic Supplementary Material (ESI) for New Journal of Chemistry.  
This journal is © The Royal Society of Chemistry 2024

## Electronic Supplementary Information

### **Resistant, stable HKUST@MC composite for highly-efficient gas adsorptive desulfurization**

Flávia H. Silva<sup>a</sup>, Leonã S. Flores<sup>a</sup>, Aline F. M. da Silva<sup>b</sup>, Célia M. Ronconi<sup>b</sup>, Alexandre A. Leitão<sup>a</sup>, Charlane C. Corrêa<sup>\*a</sup>

<sup>a</sup>Department of Chemistry, Federal University of Juiz de Fora (UFJF), 36036-900, Juiz de Fora, MG, Brazil.

<sup>b</sup>Department of Inorganic Chemistry, Fluminense Federal University (UFF), Chemistry Institute, 24020-141, Niterói, RJ, Brazil

\*Correspondence e-mail: [charlane.cimini@ufjf.br](mailto:charlane.cimini@ufjf.br)

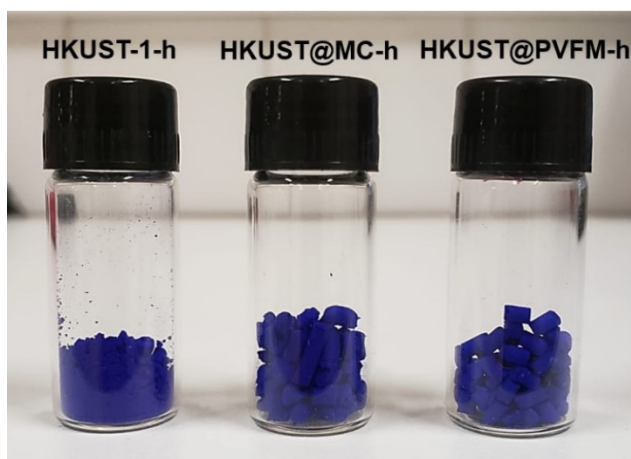

Fig. S1 Photograph of heating activated samples HKUST-1-h, HKUST@MC-h and HKUST@PVFM-h

### Materials for synthesis of HKUST-1-s

Copper (II) nitrate trihydrate (CAS 10031-43-3), 1,3,5-benzenetricarboxylic acid (CAS 554-95-0), N,N-dimethylformamide (DMF) (CAS 68-12-2) and ethanol (EtOH) (CAS 64-17-5) were purchased from Sigma-Aldrich. All the materials were analytical grade and used without further purification.

### Synthesis of HKUST-1-s

Copper (II) nitrate trihydrate (3.0 g) and 1,3,5-benzenetricarboxylic acid (2.0 g) were added to a 250 ml round bottom flask containing DMF as solvent (150 ml). The mixture was sonicated for 30 min. The solution was then heated at 80 °C in an oil bath at reflux condition at atmospheric pressure for 12 h. After this stage, the product was washed twice with DMF and ethanol. Therefore, 150 mL of a mixture of ethanol and deionized water (volume ratio of 1:1) and the solid were placed on a magnetic stirrer and stirred for 12 h. Then, the solid was isolated by filtration and dried at 110 °C for 24 h.

## XRPD Analysis

The samples were activated at 110 °C for 24 h, stored in Eppendorf tubes and analyzed by PXRD immediately after heating activation and after 30 days. The HKUST-1-s-h showed a completely different XRPD pattern 30 days after activation process (Fig. S2), while HKUST-s@MC-h maintained the XRPD pattern characteristic of HKUST-1.

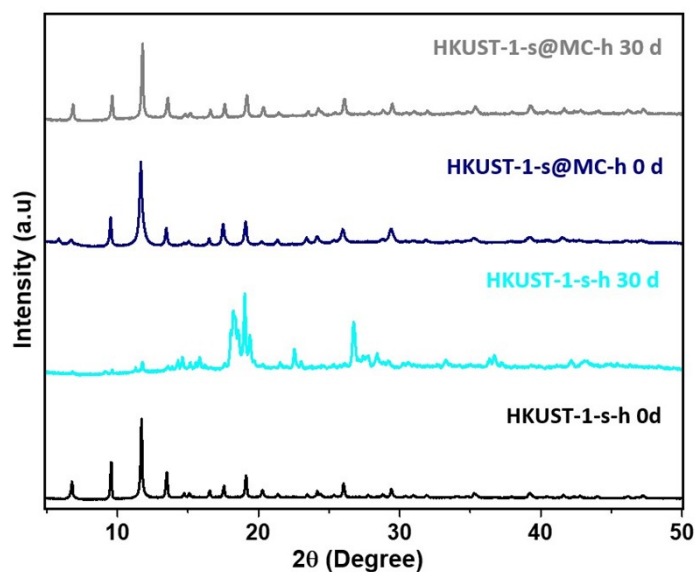

Fig. S2 XRPD patterns of HKUST-1-s-h and HKUST-s@MC-h at 0d, and 30d after heating activation

## Nitrogen adsorption/desorption measurements

The BET specific surface area of the HKUST-s@MC-h after 30 days of storage was 1820.6 m<sup>2</sup>g<sup>-1</sup>, while that of HKUST-1-s-h was only 496.6 m<sup>2</sup>g<sup>-1</sup>. The micropore volumes were also very different for shaped sample and pristine MOF, 0.75 m<sup>3</sup>g<sup>-1</sup> and 0.20 m<sup>3</sup>g<sup>-1</sup>, respectively. The composite exhibited a type I isotherm characteristic of HKUST-1, whereas the pristine MOF exhibited a type 4 isotherm (Fig. S3). The characteristic textural properties of HKUST-1 were maintained in the shaped composite.

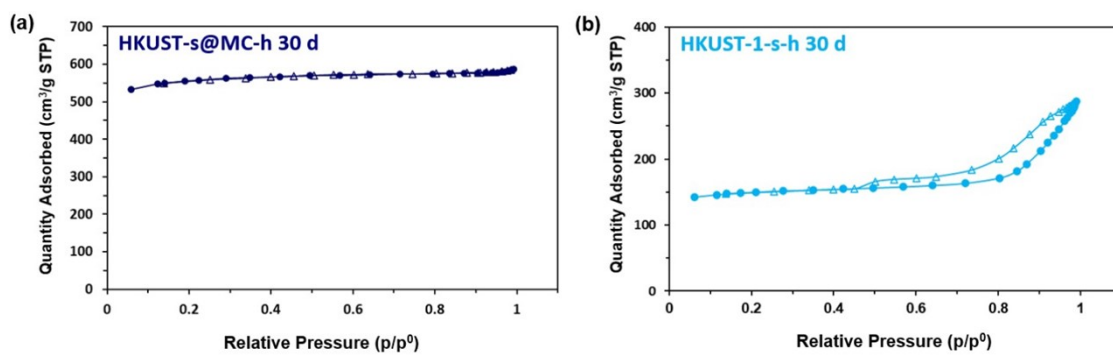

Fig. S3 Nitrogen adsorption/desorption isotherms of HKUST-1-s-h and HKUST-1@MC-h
