# Supplementary material for: A resistant and stable HKUST@MC composite for highly efficient gas adsorptive desulfurization
Source: Royal Society of Chemistry journal article supplement (doi:10.1039/d3nj05614g), 2024-01-01
Supplement: d3nj05614g5.pdf [file d3nj05614g5.pdf]

Electronic Supplementary Material (ESI) for New Journal of Chemistry.

This journal is © The Royal Society of Chemistry and the Centre National de la Recherche Scientifique
