# Supplementary figures and images for: A resistant and stable HKUST@MC composite for highly efficient gas adsorptive desulfurization
Source: Royal Society of Chemistry journal article supplement (doi:10.1039/d3nj05614g), 2024-01-01

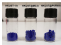

Supplement: d3nj05614g3.pdf [file d3nj05614g3.pdf]
